# Supplementary material for: Peroxidase-like activity of chitosan stabilized silver nanoparticles for visual and colorimetric detection of glucose
Source: Royal Society of Chemistry journal article supplement (doi:10.1039/c2an35911a), 2012-01-01
Supplement: c2an35911a.pdf [file c2an35911a.pdf]

Electronic Supplementary Information

**The peroxidase-like activity of chitosan stabilized silver nanoparticles**

**for visual and colorimetric detection of glucose**

**Huan Jiang,<sup>a</sup> Zhaohui Chen,<sup>\*a,b</sup> Haiyan Cao,<sup>a</sup> Yuming Huang<sup>\*a</sup>**

*<sup>a</sup> The Key Laboratory of Luminescence and Real-time Analysis, Ministry of Education, College of Chemistry and Chemical Engineering, Southwest University, Chongqing 400715, China. E-mail: ymhuang@swu.edu.cn, zhaohuic@swu.edu.cn*

*<sup>b</sup> Basic Department of Rongchang Campus, Southwest University, Chongqing 402460, China*

**Table S1.** The surface charges of different ligands capped Ag nanoparticles.

| Nanoparticles                     | Zeta Potential (mV) |
|-----------------------------------|---------------------|
| Ch-Ag NPs                         | +58.7               |
| citrate-capped Ag NPs             | -31.4               |
| tannic acid-capped Ag NPs         | -36.5               |
| polyethylene glycol-capped Ag NPs | -24.4               |

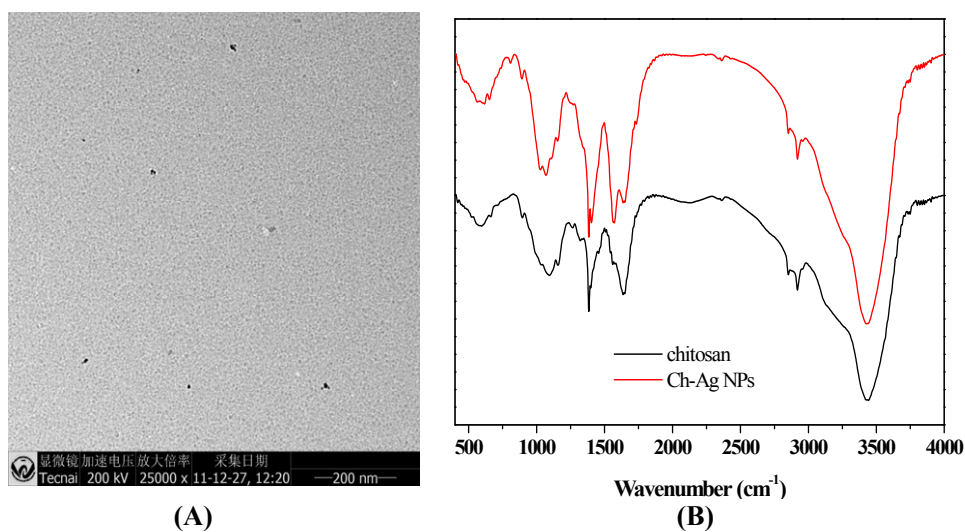

**Figure S1.** (A) TEM image of Ch-Ag NPs. (B) FT-IR spectra of chitosan and the synthesized Ch-Ag NPs.

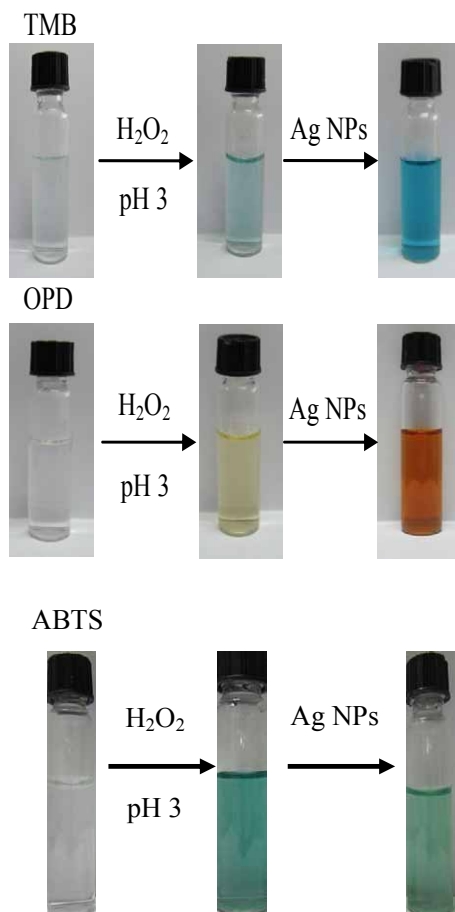

**Figure S2.** Images of oxidation color reaction of TMB, OPD and ABTS by  $H_2O_2$  with and without Ch-Ag NPs.

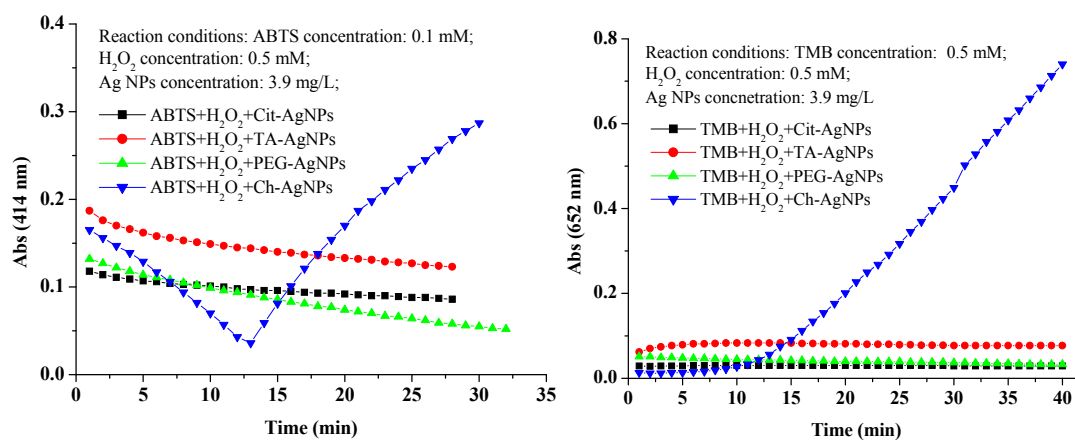

**Figure S3.** Time-dependent absorbance changes at 414 nm of ABTS and 652 nm of TMB with different ligands-capped Ag NPs.

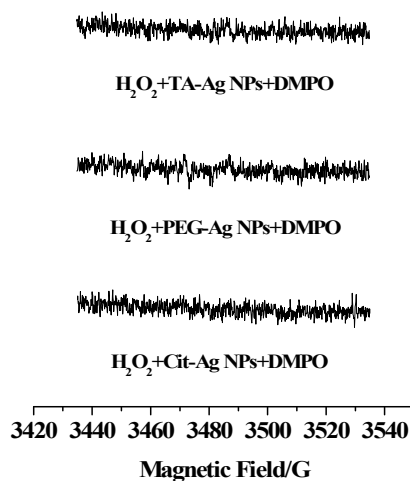

**Figure S4.** ESR spectra of hydroxyl radicals in the systems of H<sub>2</sub>O<sub>2</sub>/TA-Ag NPs/DMPO, H<sub>2</sub>O<sub>2</sub>/PEG-Ag NPs-DMPO, H<sub>2</sub>O<sub>2</sub>/Cit-Ag NPs/DMPO. Conditions: 12 mM DMPO, 30 mM H<sub>2</sub>O<sub>2</sub>, 13.1 mg L<sup>-1</sup> Ag NPs (as Ag), and 0.2 M NaAc buffer.

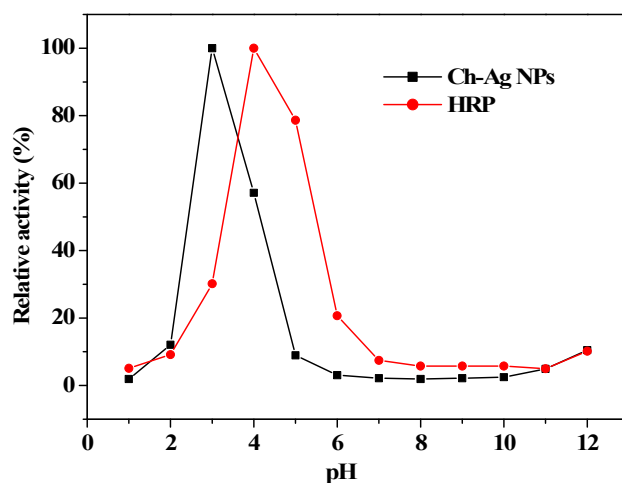

**Figure S5.** The effect of pH. Reaction conditions for Ch-Ag NPs are: Ch-Ag NPs:  $0.86 \text{ mg L}^{-1}$ , TMB:  $1 \times 10^{-4} \text{ M}$ ,  $\text{H}_2\text{O}_2$ :  $1 \text{ mM}$ ,  $0.2 \text{ M NaAc}$  buffer. Reaction conditions for HRP are: HRP:  $1 \text{ ng mL}^{-1}$ , TMB:  $5 \times 10^{-5} \text{ M}$ ,  $\text{H}_2\text{O}_2$ :  $1 \text{ mM}$ ,  $0.2 \text{ M NaAc}$  buffer.

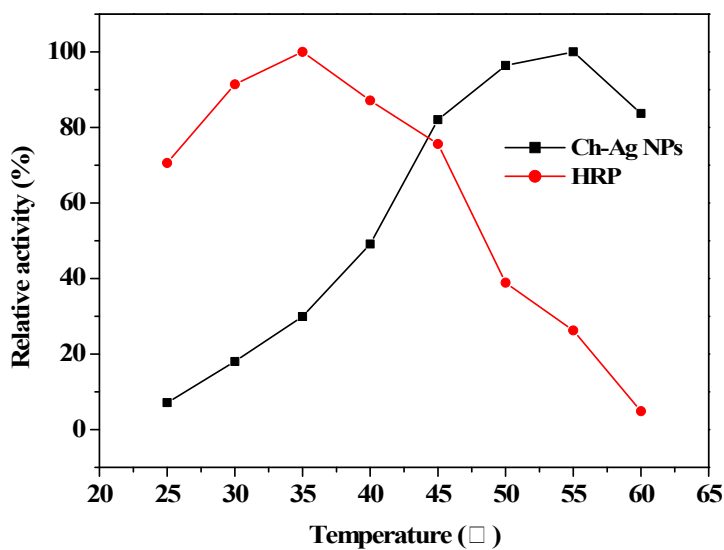

**Figure S6.** The effect of temperature. Reaction conditions for Ch-Ag NPs are: Ch-Ag NPs:  $0.86 \text{ mg L}^{-1}$ , TMB:  $1 \times 10^{-4} \text{ M}$ ,  $\text{H}_2\text{O}_2$ :  $1 \text{ mM}$ ,  $0.2 \text{ M NaAc}$  buffer. Reaction conditions for HRP are: HRP:  $1 \text{ ng mL}^{-1}$ , TMB:  $5 \times 10^{-5} \text{ M}$ ,  $\text{H}_2\text{O}_2$ :  $1 \text{ mM}$ ,  $0.2 \text{ M NaAc}$  buffer.

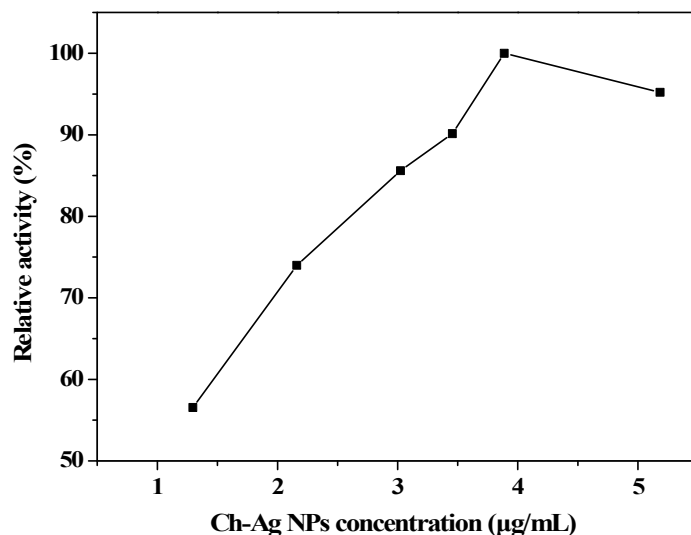

**Figure S7.** The effect of Ch-Ag NPs concentration. Reaction conditions: Ch-Ag NPs:  $0.86 \text{ mg L}^{-1}$ , TMB:  $1 \times 10^{-4} \text{ M}$ ,  $\text{H}_2\text{O}_2$ : 1 mM, 0.2 M NaAc buffer (pH=3.0).

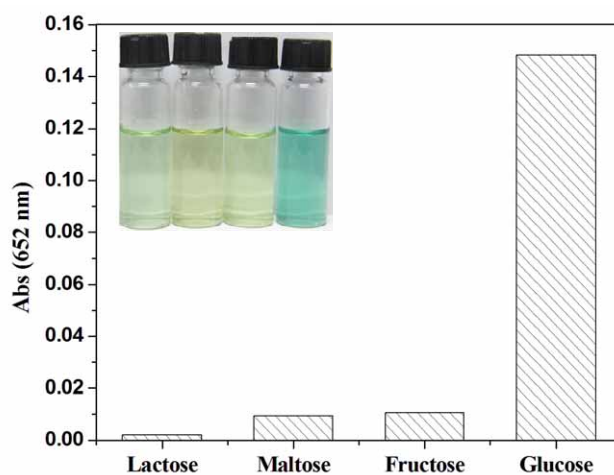

**Figure S8.** Determination of the selectivity of glucose detection was performed by 1 mM maltose, 5 mM lactose, and 5 mM fructose instead of 0.5 mM glucose under the same reaction conditions. Inset highlights the images of production of color product for different targets.
